# Supplementary material for: Staphylococcus saccharolyticus Isolated From Blood Cultures and Prosthetic Joint Infections Exhibits Excessive Genome Decay
Source: Front Microbiol. 2019 Mar 12;10:478. doi: 10.3389/fmicb.2019.00478 (PMC6423177; doi:10.3389/fmicb.2019.00478)
Supplement: Supplementary file 2 [file Table_2.XLSX]

## Sheet: Table S2
Table S2. Average nucleotide identity (ANI) based on Blast+ of staphylococcal genomes
The program JSpeciesWS was used to calculate the pairwise ANIs. Dark green, >98%; light green, <98% and >95%; yellow, <95% and >80%
	05B0362	12B0021	13T0028	DVP3-16-6167	DVP2-17-2406	DVP4-17-2404	DVP5-16-4677	ATCC14953_DRR	ATCC14953_SRR	OG2_1 *	OG2_2 *	KR *	CR01	AYP1020	C87	TW2795	FDAARGOS	ATCC12228	AU23	SEI	RP62A	AU24	FS1	14.1.R1
S. saccharolyticus_05B0362	---	99.99	99.97	99.99	97.91	97.91	97.91	99.9	99.9	79.39	79.78	79.41	79.41	79.4	79.44	79.41	79.46	79.66	79.62	79.66	79.64	79.69	79.77	79.7
S. saccharolyticus_12B0021	99.99	---	99.96	99.99	97.9	97.9	97.89	99.9	99.9	79.4	79.76	79.38	79.39	79.34	79.39	79.38	79.41	79.67	79.66	79.68	79.67	79.76	79.76	79.76
S. saccharolyticus_13T0028	99.98	99.98	---	99.98	97.94	97.94	97.93	99.8	99.8	79.43	79.74	79.43	79.43	79.38	79.46	79.42	79.44	79.78	79.75	79.76	79.77	79.78	79.77	79.8
S. saccharolyticus_DVP3-16-6167	99.98	99.98	99.95	---	97.89	97.89	97.88	99.9	99.9	79.37	79.73	79.4	79.38	79.34	79.41	79.37	79.41	79.69	79.66	79.68	79.68	79.71	79.79	79.78
S. saccharolyticus_DVP2-17-2406	97.99	97.99	97.99	97.99	---	100	99.98	98	98	79.25	79.56	79.28	79.29	79.26	79.3	79.28	79.32	79.59	79.58	79.57	79.58	79.61	79.61	79.67
S. saccharolyticus_DVP4-17-2404	98	97.99	97.99	97.99	100	---	99.98	97.99	97.98	79.29	79.59	79.34	79.29	79.28	79.35	79.32	79.35	79.63	79.61	79.61	79.6	79.65	79.62	79.67
S. saccharolyticus_DVP5-16-4677	97.98	97.98	97.98	97.98	99.97	99.97	---	97.99	97.98	79.22	79.66	79.23	79.21	79.25	79.28	79.25	79.3	79.71	79.68	79.64	79.68	79.69	79.66	79.73
S. saccharolyticus_ATCC14953_DRR	99.99	99.99	99.97	99.99	97.93	97.93	97.92	---	100	79.34	79.71	79.37	79.35	79.29	79.35	79.34	79.36	79.68	79.63	79.65	79.64	79.71	79.71	79.75
S. saccharolyticus_ATCC14953_SRR	99.99	99.99	99.97	99.99	97.92	97.92	97.92	100	---	79.34	79.71	79.37	79.35	79.29	79.35	79.34	79.36	79.68	79.63	79.65	79.64	79.71	79.71	79.75
S. capitis_OG2_1 *	79.32	79.32	79.31	79.32	79.11	79.11	79.07	79.44	79.46	---	82.8	96.28	98.57	98.4	96.28	99.37	98.72	78.28	78.13	78.06	78.13	78.1	78.19	78.48
S. capitis_OG2_2 *	79.78	79.77	79.77	79.77	79.53	79.53	79.5	79.78	79.76	82.99	---	83.21	82.92	82.95	83.12	83.37	82.96	78.47	78.38	78.32	78.25	78.42	78.22	78.34
S. capitis_KR *	79.33	79.33	79.3	79.33	79.19	79.19	79.16	79.32	79.33	96.38	83	---	96.41	96.33	99.72	96.35	96.43	78.43	78.43	78.35	78.34	78.43	78.52	78.39
S. capitis_CR01	79.34	79.34	79.34	79.34	79.1	79.1	79.07	79.43	79.43	98.76	82.75	96.56	---	98.72	96.5	99.02	99.32	78.15	78.16	78.04	78.23	78.24	78.18	78.06
S. capitis_AYP1020	79.48	79.49	79.49	79.43	79.29	79.27	79.24	79.48	79.48	98.68	82.99	96.54	98.8	---	96.53	98.89	98.92	78.44	78.42	78.4	78.35	78.37	78.4	78.38
S. capitis_C87	79.44	79.47	79.45	79.47	79.36	79.35	79.32	79.51	79.49	96.37	83.08	99.8	96.32	96.34	---	96.34	96.39	78.53	78.5	78.43	78.44	78.44	78.6	78.45
S. capitis_TW2795	79.5	79.51	79.5	79.49	79.32	79.32	79.26	79.44	79.35	99.71	83.28	96.6	99.1	98.9	96.56	---	98.94	78.25	78.2	78.21	78.52	78.15	78.15	78.31
S. capitis_FDAARGOS	79.49	79.49	79.48	79.47	79.3	79.31	79.23	79.33	79.32	98.76	82.93	96.38	99.15	98.66	96.38	98.67	---	78.4	78.32	78.2	78.23	78.21	78.33	78.4
S. epidermidis_ATCC12228	79.8	79.81	79.84	79.8	79.76	79.75	79.71	79.8	79.85	78.59	78.58	78.83	78.35	78.35	78.87	78.2	78.52	---	99.52	99.32	99.2	99.52	98.29	97
S. epidermidis_AU23	79.81	79.82	79.85	79.81	79.72	79.74	79.69	79.82	79.81	78.61	78.56	79	78.49	78.51	79.02	78.38	78.67	99.52	---	99.28	99.22	99.47	98.26	96.99
S. epidermidis_SEI	79.82	79.81	79.79	79.78	79.69	79.69	79.62	79.82	79.84	78.39	78.42	78.76	78.16	78.33	78.87	78.25	78.36	99.34	99.29	---	98.98	99.29	98.27	97.09
S. epidermidis_RP62A	79.77	79.8	79.8	79.81	79.63	79.63	79.59	79.77	79.7	78.46	78.29	78.68	78.37	78.25	78.68	78.63	78.42	99.18	99.25	98.98	---	99.3	98.15	97.22
S. epidermidis_AU24	79.69	79.68	79.68	79.67	79.58	79.58	79.56	79.7	79.62	78.23	78.33	78.42	78.2	78.1	78.33	77.98	78.19	99.51	99.47	99.26	99.29	---	98.29	96.98
S. epidermidis_FS1	79.63	79.63	79.52	79.63	79.45	79.45	79.42	79.58	79.6	78.19	78.11	78.32	78.15	78.05	78.43	77.92	78.14	98.16	98.19	98.09	98.04	98.2	---	96.61
S. epidermidis_14.1.R1	79.8	79.81	79.76	79.81	79.67	79.67	79.63	79.81	79.83	78.59	78.24	78.37	78.13	78.27	78.41	78.21	78.54	96.92	96.92	96.96	97.15	96.96	96.63	---
* misclassified in public databases as S. saccharolyticus
