# Supplementary material for: Staphylococcus saccharolyticus Isolated From Blood Cultures and Prosthetic Joint Infections Exhibits Excessive Genome Decay
Source: Front Microbiol. 2019 Mar 12;10:478. doi: 10.3389/fmicb.2019.00478 (PMC6423177; doi:10.3389/fmicb.2019.00478)
Supplement: Supplementary file 5 [file Table_5.XLSX]

## Sheet: Table S5A
Table S5A: Secretome of S. saccharolyticus strain 13T0028 grown for 4 days in BHCY medium
Accession Nr	Annotation (RAST)	Mass kDa	Score	Significant Matches	Coverage %	Unique Peptides	emPAI
13T0028_peg.2671	Heat shock protein 60 family chaperone GroEL	57.582	1617	41	33.2	17	3.42
13T0028_peg.1579	Enolase (EC 4.2.1.11)	47.26	1479	37	45.2	17	4.52
13T0028_peg.1550	putative extracellular amidase	29.448	1308	35	39.8	7	4.87
13T0028_peg.415	Glycerol dehydrogenase (EC 1.1.1.6)	40.137	1053	22	35.9	10	3.13
13T0028_peg.411	Ornithine carbamoyltransferase (EC 2.1.3.3)	37.827	915	30	33	11	4.78
13T0028_peg.483	Triacylglycerol lipase (EC 3.1.1.3)	79.477	907	31	21.2	14	1.61
13T0028_peg.1013	Thioredoxin	11.54	729	17	75	8	24.16
13T0028_peg.1809	DNA-binding protein HBsu	9.634	692	15	63.3	5	9.99
13T0028_peg.1920	Chaperone protein DnaK	65.835	684	23	18.3	12	1.38
13T0028_peg.690	Immunodominant staphylococcal antigen A precursor	24.028	667	19	8.7	3	1.68
13T0028_peg.2672	Heat shock protein 60 family co-chaperone GroES	10.253	619	18	58.5	5	14.25
13T0028_peg.140	Alkyl hydroperoxide reductase protein C (EC 1.6.4.-)	21.196	594	15	39.2	6	3.74
13T0028_peg.2413	LSU ribosomal protein L7/L12 (P1/P2)	12.683	530	11	45.1	6	8.13
13T0028_peg.1575	NAD-dependent glyceraldehyde-3-phosphate dehydrogenase (EC 1.2.1.12)	36.308	497	19	27.4	9	2.24
13T0028_peg.1766	Bifunctional autolysin Atl / N-acetylmuramoyl-L-alanine amidase (EC 3.5.1.28)/ endo-beta-N-acetylglucosaminidase (EC 3.2.1.96)	148.507	456	17	7.6	11	0.42
13T0028_peg.416	Phosphoenolpyruvate-dihydroxyacetone phosphotransferase (EC 2.7.1.121), dihydroxyacetone binding subunit DhaK	34.81	398	13	17.8	7	1.59
13T0028_peg.1113	Ribosome recycling factor	20.455	389	11	33.2	7	4.03
13T0028_peg.385	Pyruvate formate-lyase (EC 2.3.1.54)	85.204	321	15	16.4	12	0.96
13T0028_peg.648	Fructose-bisphosphate aldolase class I (EC 4.1.2.13)	33.063	310	9	18.9	5	1.05
13T0028_peg.547	Ornithine carbamoyltransferase (EC 2.1.3.3)	38.072	301	15	17.3	5	1.39
13T0028_peg.1577	Triosephosphate isomerase (EC 5.3.1.1)	27.582	300	9	34.4	8	2.95
13T0028_peg.153	SSU ribosomal protein S6p	11.69	292	11	41.8	6	9.98
13T0028_peg.728	Threonine dehydrogenase and related Zn-dependent dehydrogenases	38.395	277	7	15.7	5	0.85
13T0028_peg.1921	Heat shock protein GrpE	24.072	261	7	19.5	5	1.66
13T0028_peg.546	Arginine deiminase (EC 3.5.3.6)	47.254	248	9	18.2	7	1.02
13T0028_peg.417	Phosphoenolpyruvate-dihydroxyacetone phosphotransferase (EC 2.7.1.121), ADP-binding subunit DhaL	21.036	247	7	27.7	6	2.82
13T0028_peg.1981	LSU ribosomal protein L27p	10.31	236	6	19.1	2	1.46
13T0028_peg.1893	Manganese superoxide dismutase (EC 1.15.1.1)	22.658	222	8	24.7	4	1.3
13T0028_peg.1776	quinol oxidase polypeptide II QoxA (EC:1.9.3.-)	42.837	211	6	7.5	3	0.39
13T0028_peg.231	LSU ribosomal protein L9p	16.388	209	6	21.6	3	1.36
13T0028_peg.952	Phosphocarrier protein of PTS system	9.521	209	5	28.4	3	3.28
13T0028_peg.2334	LSU ribosomal protein L15p (L27Ae)	15.609	205	4	24	3	1.46
13T0028_peg.1111	Translation elongation factor Ts	32.513	204	7	17.5	6	1.4
13T0028_peg.2342	LSU ribosomal protein L17p	13.729	198	8	32	4	2.89
13T0028_peg.1381	Staphylococcal accessory regulator A (SarA)	14.835	188	5	23.4	3	1.57
13T0028_peg.2330	LSU ribosomal protein L6p (L9e)	19.627	186	6	20.2	3	1.05
13T0028_peg.2528	ATP synthase alpha chain (EC 3.6.3.14)	54.861	181	11	10.1	6	0.68
13T0028_peg.863	Phosphoglycerate mutase (EC 5.4.2.1)	26.839	173	8	33.2	7	2.43
13T0028_peg.1983	LSU ribosomal protein L21p	11.301	166	7	26.5	3	4.17
13T0028_peg.932	Chitinase B	11.372	164	4	19	3	2.43
13T0028_peg.2613	Immunodominant antigen B	20.754	162	3	10.9	2	0.57
13T0028_peg.2693	LSU ribosomal protein L25p	23.807	147	5	23.3	5	1.7
13T0028_peg.433	Triacylglycerol lipase (EC 3.1.1.3)	81.495	147	4	5.1	3	0.26
13T0028_peg.2323	LSU ribosomal protein L29p (L35e)	8.085	146	3	50.7	3	4.49
13T0028_peg.2421	Translation elongation factor Tu	43.203	140	4	12.9	4	0.55
13T0028_peg.2543	LSU ribosomal protein L31p @ LSU ribosomal protein L31p, zinc-independent	9.799	139	3	29.4	2	1.58
13T0028_peg.2370	alkaline shock protein 23	18.837	132	3	12.5	2	0.65
13T0028_peg.2326	LSU ribosomal protein L24p (L26e)	11.454	128	4	26.7	3	2.39
13T0028_peg.2482	Hemoprotein HemQ, essential component of heme biosynthetic pathway in Gram-positive bacteria	29.751	122	6	15.7	4	0.89
13T0028_peg.1109	GTP-sensing transcriptional pleiotropic repressor codY	28.845	111	3	7.8	2	0.39
13T0028_peg.2348	SSU ribosomal protein S9p (S16e)	14.637	111	3	7.7	1	0.38
13T0028_peg.2696	Protein of unknown function identified by role in sporulation (SpoVG)	11.518	111	4	31.4	3	2.35
13T0028_peg.187	Triacylglycerol lipase (EC 3.1.1.3)	74.384	104	3	3	1	0.14
13T0028_peg.2341	DNA-directed RNA polymerase alpha subunit (EC 2.7.7.6)	34.991	98	4	13.4	4	0.72
13T0028_peg.538	2,3-butanediol dehydrogenase, S-alcohol forming, (R)-acetoin-specific (EC 1.1.1.4) / Acetoin (diacetyl) reductase (EC 1.1.1.5)	27.868	98	4	10	3	0.66
13T0028_peg.1919	Chaperone protein DnaJ	41.625	97	1	2.9	1	0.12
13T0028_peg.50	FIG000557: hypothetical protein co-occurring with RecR	11.59	97	2	7.6	1	0.5
13T0028_peg.206	Alanine dehydrogenase (EC 1.4.1.1)	39.731	94	3	6.7	3	0.43
13T0028_peg.410	Carbamate kinase (EC 2.7.2.2)	33.644	94	4	12.6	4	0.76
13T0028_peg.2526	ATP synthase beta chain (EC 3.6.3.14)	51.606	89	4	10.4	4	0.45
13T0028_peg.1090	SSU ribosomal protein S16p	10.333	88	2	8.8	1	0.57
13T0028_peg.2338	LSU ribosomal protein L36p	4.459	88	3	24.3	1	6.44
13T0028_peg.2331	LSU ribosomal protein L18p (L5e)	13.261	86	2	14.2	2	1.03
13T0028_peg.2150	Hypothetical protein SAV1845	13.392	84	2	7.9	1	0.42
13T0028_peg.2333	LSU ribosomal protein L30p (L7e)	6.578	84	4	50.8	3	7.07
13T0028_peg.2410	LSU ribosomal protein L11p (L12e)	14.949	84	5	20.7	3	1.55
13T0028_peg.2004	Cell division trigger factor (EC 5.2.1.8)	48.624	81	4	9.5	4	0.48
13T0028_peg.1925	SSU ribosomal protein S20p	9.212	77	3	27.7	2	1.73
13T0028_peg.2315	LSU ribosomal protein L3p (L3e)	23.684	75	4	10.9	2	0.82
13T0028_peg.1825	Staphylococcal respiratory response protein SrrA	28.073	73	2	10.8	2	0.4
13T0028_peg.1164	Glutamine synthetase type I (EC 6.3.1.2)	51.025	72	2	4.3	2	0.2
13T0028_peg.2007	LSU ribosomal protein L20p	13.691	72	2	12.7	2	0.98
13T0028_peg.2519	SceD-like transglycosylase, biomarker for vancomycin-intermediate strains	23.851	72	1	7.9	1	0.22
13T0028_peg.1084	Acyl carrier protein / HmrB protein involved in methicillin resistance	8.559	67	2	9.1	1	0.71
13T0028_peg.1620	FIG01108089: hypothetical protein	6.793	66	2	36.5	2	2.85
13T0028_peg.2025	Pyruvate kinase (EC 2.7.1.40)	63.165	66	1	2.2	1	0.08
13T0028_peg.2139	Uncharacterized protein, homolog of B.subtilis yhgC	19.366	64	2	13.8	2	0.63
13T0028_peg.2566	Purine nucleoside phosphorylase (EC 2.4.2.1)	25.861	63	3	8.1	2	0.44
13T0028_peg.2375	Heme ABC type transporter HtsABC, heme-binding protein	37.229	62	2	5.7	2	0.29
13T0028_peg.813	FIG01108263: hypothetical protein	17.634	62	2	6.5	1	0.31
13T0028_peg.2679	Cysteine synthase (EC 2.5.1.47)	33.159	59	1	3.5	1	0.15
13T0028_peg.322	hypothetical protein	5.135	59	1	43.1	1	1.41
13T0028_peg.1061	DNA-directed RNA polymerase omega subunit (EC 2.7.7.6)	7.656	53	1	12.9	1	0.82
13T0028_peg.326	Hyaluronate lyase precursor (EC 4.2.2.1)	92.139	53	2	1.9	2	0.11
13T0028_peg.1648	D-alanine--poly(phosphoribitol) ligase subunit 2 (EC 6.1.1.13)	9.045	52	1	11.5	1	0.67
13T0028_peg.1782	Cell division protein GpsB, coordinates the switch between cylindrical and septal cell wall synthesis by re-localization of PBP1	12.941	51	1	8.9	1	0.43
13T0028_peg.1998	Porphobilinogen synthase (EC 4.2.1.24)	62.959	49	1	1.8	1	0.08
13T0028_peg.1364	Alcohol dehydrogenase (EC 1.1.1.1)	36.518	48	1	3	1	0.14
13T0028_peg.281	hypothetical protein	5.331	48	1	18.8	1	1.33
13T0028_peg.2336	Adenylate kinase (EC 2.7.4.3)	24.173	47	1	4.7	1	0.22

## Sheet: Table S5B
Table S5B: Secretome of S. saccharolyticus strain 13T0028 grown for 7 days in BHCY medium
Accession Nr	Annotation (RAST)	Mass kDa	Score	Significant Matches	Coverage %	Unique Peptides	emPAI
13T0028_peg.411	Ornithine carbamoyltransferase (EC 2.1.3.3)	37.827	2436	72	45.6	12	6.51
13T0028_peg.1920	Chaperone protein DnaK	65.835	2424	66	38.6	23	4.73
13T0028_peg.415	Glycerol dehydrogenase (EC 1.1.1.6)	40.137	2099	49	37.5	10	2.69
13T0028_peg.1550	putative extracellular amidase	29.448	1895	55	46.3	9	5.96
13T0028_peg.1579	Enolase (EC 4.2.1.11)	47.26	1812	46	44.9	18	5.82
13T0028_peg.1013	Thioredoxin	11.54	1681	39	93.3	10	84.76
13T0028_peg.1809	DNA-binding protein HBsu	9.634	1680	36	63.3	7	28
13T0028_peg.2672	Heat shock protein 60 family co-chaperone GroES	10.253	1553	39	58.5	5	14.4
13T0028_peg.483	Triacylglycerol lipase (EC 3.1.1.3)	79.477	1479	55	32.2	21	3.51
13T0028_peg.140	Alkyl hydroperoxide reductase protein C (EC 1.6.4.-)	21.196	1340	36	56.6	8	6.46
13T0028_peg.2671	Heat shock protein 60 family chaperone GroEL	57.582	1105	33	31	16	2.78
13T0028_peg.1113	Ribosome recycling factor	20.455	1003	27	37	9	7.05
13T0028_peg.690	Immunodominant staphylococcal antigen A precursor	24.028	907	31	7.8	2	1.21
13T0028_peg.1766	Bifunctional autolysin Atl / N-acetylmuramoyl-L-alanine amidase (EC 3.5.1.28)/ endo-beta-N-acetylglucosaminidase (EC 3.2.1.96)	148.507	784	22	12.3	16	0.68
13T0028_peg.1577	Triosephosphate isomerase (EC 5.3.1.1)	27.582	687	17	47.8	10	4.62
13T0028_peg.231	LSU ribosomal protein L9p	16.388	676	23	54.7	9	12.22
13T0028_peg.863	Phosphoglycerate mutase (EC 5.4.2.1)	26.839	616	18	51.5	11	7.35
13T0028_peg.2413	LSU ribosomal protein L7/L12 (P1/P2)	12.683	607	20	49.2	5	8.21
13T0028_peg.546	Arginine deiminase (EC 3.5.3.6)	47.254	555	17	25.5	10	1.75
13T0028_peg.1575	NAD-dependent glyceraldehyde-3-phosphate dehydrogenase (EC 1.2.1.12)	36.308	550	17	25.3	8	1.86
13T0028_peg.547	Ornithine carbamoyltransferase (EC 2.1.3.3)	38.072	528	20	17.3	5	1.72
13T0028_peg.2693	LSU ribosomal protein L25p	23.807	518	15	36.1	7	3.05
13T0028_peg.648	Fructose-bisphosphate aldolase class I (EC 4.1.2.13)	33.063	517	14	37.2	9	2.65
13T0028_peg.1921	Heat shock protein GrpE	24.072	514	14	27.6	6	2.26
13T0028_peg.952	Phosphocarrier protein of PTS system	9.521	504	12	40.9	3	10.38
13T0028_peg.1981	LSU ribosomal protein L27p	10.31	483	14	45.7	6	13.97
13T0028_peg.1776	quinol oxidase polypeptide II QoxA (EC:1.9.3.-)	42.837	426	16	21.9	9	1.73
13T0028_peg.2696	Protein of unknown function identified by role in sporulation (SpoVG)	11.518	422	12	42.2	5	10.34
13T0028_peg.1717	Oligoendopeptidase F (EC 3.4.24.-)	69.927	399	16	12.3	8	0.85
13T0028_peg.2326	LSU ribosomal protein L24p (L26e)	11.454	364	14	27.6	4	4.12
13T0028_peg.2410	LSU ribosomal protein L11p (L12e)	14.949	364	12	31.4	5	5.57
13T0028_peg.2375	Heme ABC type transporter HtsABC, heme-binding protein	37.229	348	11	18.4	6	1.45
13T0028_peg.2333	LSU ribosomal protein L30p (L7e)	6.578	344	10	69.5	5	31.75
13T0028_peg.385	Pyruvate formate-lyase (EC 2.3.1.54)	85.204	334	17	15.8	12	0.96
13T0028_peg.1949	Transcription elongation factor GreA	17.673	321	11	26.6	4	2.81
13T0028_peg.2370	alkaline shock protein 23	18.837	302	6	19.6	3	1.12
13T0028_peg.1111	Translation elongation factor Ts	32.513	297	9	20.2	6	1.41
13T0028_peg.2336	Adenylate kinase (EC 2.7.4.3)	24.173	297	6	20.9	4	1.19
13T0028_peg.417	Phosphoenolpyruvate-dihydroxyacetone phosphotransferase (EC 2.7.1.121), ADP-binding subunit DhaL	21.036	285	9	27.7	6	2.85
13T0028_peg.433	Triacylglycerol lipase (EC 3.1.1.3)	81.495	282	12	11.7	7	0.7
13T0028_peg.2146	Foldase protein PrsA precursor (EC 5.2.1.8) @ Foldase clustered with pyrimidine conversion	36.481	274	10	15.4	6	1.19
13T0028_peg.326	Hyaluronate lyase precursor (EC 4.2.2.1)	92.139	264	9	8.4	7	0.52
13T0028_peg.2526	ATP synthase beta chain (EC 3.6.3.14)	51.606	263	8	12.8	5	0.59
13T0028_peg.2139	Uncharacterized protein, homolog of B.subtilis yhgC	19.366	248	10	35.9	6	3.34
13T0028_peg.2482	Hemoprotein HemQ, essential component of heme biosynthetic pathway in Gram-positive bacteria	29.751	247	13	28.1	8	2.59
13T0028_peg.1925	SSU ribosomal protein S20p	9.212	245	4	27.7	2	1.74
13T0028_peg.50	FIG000557: hypothetical protein co-occurring with RecR	11.59	243	6	34.3	3	2.37
13T0028_peg.2421	Translation elongation factor Tu	43.203	241	8	14.2	5	0.74
13T0028_peg.1893	Manganese superoxide dismutase (EC 1.15.1.1)	22.658	240	6	21.7	3	0.87
13T0028_peg.2543	LSU ribosomal protein L31p @ LSU ribosomal protein L31p, zinc-independent	9.799	237	5	29.4	2	1.59
13T0028_peg.153	SSU ribosomal protein S6p	11.69	234	11	41.8	6	10.09
13T0028_peg.2613	Immunodominant antigen B	20.754	217	7	22.4	4	2.13
13T0028_peg.2319	SSU ribosomal protein S19p (S15e)	10.567	215	7	43.5	3	2.76
13T0028_peg.2528	ATP synthase alpha chain (EC 3.6.3.14)	54.861	209	10	11.5	6	0.69
13T0028_peg.1782	Cell division protein GpsB, coordinates the switch between cylindrical and septal cell wall synthesis by re-localization of PBP1	12.941	207	6	32.1	3	3.24
13T0028_peg.728	Threonine dehydrogenase and related Zn-dependent dehydrogenases	38.395	203	5	9.4	3	0.45
13T0028_peg.2004	Cell division trigger factor (EC 5.2.1.8)	48.624	200	6	9.5	4	0.48
13T0028_peg.2331	LSU ribosomal protein L18p (L5e)	13.261	192	3	18.3	2	1.03
13T0028_peg.1620	FIG01108089: hypothetical protein	6.793	185	7	50.8	4	13.94
13T0028_peg.2334	LSU ribosomal protein L15p (L27Ae)	15.609	183	4	24	3	1.47
13T0028_peg.932	Chitinase B	11.372	179	7	19	3	2.45
13T0028_peg.1983	LSU ribosomal protein L21p	11.301	178	9	53.9	5	10.87
13T0028_peg.2684	RNA binding protein, contains ribosomal protein S1 domain	14.784	163	5	15	2	0.89
13T0028_peg.783	FIG01108416: hypothetical protein	15.856	162	6	19	3	1.44
13T0028_peg.1381	Staphylococcal accessory regulator A (SarA)	14.835	160	6	24.2	4	2.54
13T0028_peg.2341	DNA-directed RNA polymerase alpha subunit (EC 2.7.7.6)	34.991	154	6	13.4	4	0.72
13T0028_peg.281	hypothetical protein	5.331	154	3	43.8	2	4.45
13T0028_peg.1194	LSU ribosomal protein L33p @ LSU ribosomal protein L33p, zinc-dependent	6.113	152	4	26.5	1	1.11
13T0028_peg.1164	Glutamine synthetase type I (EC 6.3.1.2)	51.025	148	6	10.8	5	0.6
13T0028_peg.1090	SSU ribosomal protein S16p	10.333	147	4	8.8	1	0.57
13T0028_peg.1084	Acyl carrier protein / HmrB protein involved in methicillin resistance	8.559	146	6	40.3	3	4.07
13T0028_peg.2551	DNA-directed RNA polymerase delta subunit (EC 2.7.7.6)	20.86	139	4	22	3	0.97
13T0028_peg.1608	Organic hydroperoxide resistance protein	15.417	133	3	15	2	0.84
13T0028_peg.1568	ATP-dependent Clp protease proteolytic subunit (EC 3.4.21.92)	21.584	129	4	16.4	3	0.93
13T0028_peg.2009	Translation initiation factor 3	20.328	128	4	11.4	2	0.59
13T0028_peg.2337	Translation initiation factor 1	8.26	126	2	25	2	2.08
13T0028_peg.962	Peptide deformylase (EC 3.5.1.88)	20.78	125	5	26.2	4	1.49
13T0028_peg.2338	LSU ribosomal protein L36p	4.459	124	3	24.3	1	6.44
13T0028_peg.1887	FIG01108604: hypothetical protein	12.374	120	5	14.8	2	1.14
13T0028_peg.2348	SSU ribosomal protein S9p (S16e)	14.637	120	2	17.7	2	0.9
13T0028_peg.416	Phosphoenolpyruvate-dihydroxyacetone phosphotransferase (EC 2.7.1.121), dihydroxyacetone binding subunit DhaK	34.81	118	5	11.6	4	0.73
13T0028_peg.2090	Hypothetical protein SAV1752	15.788	113	7	23.6	4	2.3
13T0028_peg.2342	LSU ribosomal protein L17p	13.729	113	4	26.2	3	1.78
13T0028_peg.1364	Alcohol dehydrogenase (EC 1.1.1.1)	36.518	109	3	6.2	2	0.3
13T0028_peg.1002	LSU ribosomal protein L32p	6.752	107	1	22.8	1	0.97
13T0028_peg.1201	FIG01108406: hypothetical protein	9.615	105	4	34.6	4	5.85
13T0028_peg.2679	Cysteine synthase (EC 2.5.1.47)	33.159	105	2	7.1	2	0.33
13T0028_peg.813	FIG01108263: hypothetical protein	17.634	104	4	12.3	2	0.71
13T0028_peg.2605	FIG010063: hypothetical protein	10.723	103	5	27.7	3	2.67
13T0028_peg.589	Cell envelope-associated transcriptional attenuator LytR-CpsA-Psr, subfamily F2 (as in PMID19099556)	34.964	99	3	6.1	2	0.31
13T0028_peg.2160	Hypothetical protein SAV1854	22.789	98	3	9.5	2	0.52
13T0028_peg.1465	Transcriptional regulator MgrA (Regulator of autolytic activity)	17.184	97	3	12.2	2	0.73
13T0028_peg.2061	Serine protease, DegP/HtrA, do-like (EC 3.4.21.-)	44.397	96	4	8.5	4	0.54
13T0028_peg.2088	D-alanine aminotransferase (EC 2.6.1.21)	32.188	93	3	10.3	3	0.56
13T0028_peg.961	Protein of unknown function DUF1447	8.702	93	2	30.6	2	1.91
13T0028_peg.152	Single-stranded DNA-binding protein	18.8	92	3	11.8	2	0.65
13T0028_peg.2323	LSU ribosomal protein L29p (L35e)	8.085	91	2	27.5	2	2.12
13T0028_peg.2391	Pyridoxine biosynthesis glutamine amidotransferase, synthase subunit (EC 2.4.2.-)	32.011	91	2	3.4	1	0.16
13T0028_peg.1262	Cold shock protein CspA	7.333	90	3	15.2	2	2.51
13T0028_peg.1497	6-carboxytetrahydropterin synthase (EC 4.1.2.50) @ Queuosine biosynthesis QueD, PTPS-I	16.3	89	2	17.3	2	0.78
13T0028_peg.2519	SceD-like transglycosylase, biomarker for vancomycin-intermediate strains	23.851	88	3	13.7	2	0.49
13T0028_peg.450	FIG01108169: hypothetical protein	19.186	87	3	26.9	3	1.09
13T0028_peg.1870	Translation elongation factor P	20.666	86	2	4.9	1	0.26
13T0028_peg.1030	Cell division protein FtsL	15.319	78	2	9	2	0.85
13T0028_peg.2150	Hypothetical protein SAV1845	13.392	78	2	7.9	1	0.42
13T0028_peg.2314	SSU ribosomal protein S10p (S20e)	11.569	77	3	16.7	2	1.25
13T0028_peg.187	Triacylglycerol lipase (EC 3.1.1.3)	74.384	76	3	3	1	0.14
13T0028_peg.2184	Multidrug resistance protein [function not yet clear]	22.978	75	3	8.8	2	0.51
13T0028_peg.2712	protein from nitrogen regulatory protein P-II (GLNB) family, ortholog YAAQ B. subtilis	12.025	68	2	8.3	1	0.48
13T0028_peg.541	immunodominant antigen B	17.663	67	1	7.5	1	0.31
13T0028_peg.1963	hypothetical protein	5.281	66	2	44.7	2	4.45
13T0028_peg.2565	Deoxyribose-phosphate aldolase (EC 4.1.2.4)	23.76	66	1	5	1	0.22
13T0028_peg.2025	Pyruvate kinase (EC 2.7.1.40)	63.165	65	2	3.9	2	0.16
13T0028_peg.2330	LSU ribosomal protein L6p (L9e)	19.627	65	1	5.6	1	0.27
13T0028_peg.2566	Purine nucleoside phosphorylase (EC 2.4.2.1)	25.861	65	2	8.5	2	0.44
13T0028_peg.759	acetyltransferase (GNAT) family protein	10.368	64	2	9.7	1	0.57
13T0028_peg.1985	Rod shape-determining protein MreC	30.816	62	2	8.9	2	0.36
13T0028_peg.2419	SSU ribosomal protein S7p (S5e)	17.767	62	1	7.7	1	0.3
13T0028_peg.880	Oligopeptide ABC transporter, periplasmic oligopeptide-binding protein OppA (TC 3.A.1.5.1)	55.588	61	1	1.6	1	0.09
13T0028_peg.528	Phage infection protein	104.819	58	1	1.1	1	0.05
13T0028_peg.1172	FIG01107992: hypothetical protein	7.488	57	2	29.2	2	2.44
13T0028_peg.129	FIG01108085: hypothetical protein	33.339	56	1	3	1	0.15
13T0028_peg.1915	SSU ribosomal protein S21p	6.968	55	1	13.8	1	0.93
13T0028_peg.1998	Porphobilinogen synthase (EC 4.2.1.24)	62.959	54	1	1.8	1	0.08
13T0028_peg.1431	Secretory antigen precursor SsaA	28.43	53	1	3.4	1	0.18
13T0028_peg.2075	Maebl	44.116	52	1	2.3	1	0.11
13T0028_peg.2076	Pyridoxamine 5'-phosphate oxidase (EC 1.4.3.5)	18.086	52	1	4.9	1	0.3
13T0028_peg.1812	SSU ribosomal protein S1p	43.238	50	1	2.6	1	0.12
13T0028_peg.2598	ThiJ/PfpI family protein	18.73	49	1	5.8	1	0.29
13T0028_peg.705	Copper(I) chaperone CopZ	7.654	47	1	19.1	1	0.82
13T0028_peg.1618	Methionine ABC transporter substrate-binding protein	30.096	46	2	6.3	2	0.37

## Sheet: Table S5C
Table S5C: Secretome of S. saccharolyticus strain DVP4-17-2404 grown for 4 days in BHCY medium
Accession Nr	Annotation (RAST)	Mass kDa	Score	Significant Matches	Coverage %	Unique Peptides	emPAI
DVP4_peg.2470	Heat shock protein 60 family chaperone GroEL	57.57	2716	58	44.2	19	5.16
DVP4_peg.307	Enolase (EC 4.2.1.11)	47.22	1496	30	50.9	18	5.78
DVP4_peg.968	DNA-binding protein HBsu	9.62	1489	25	63.3	6	16.74
DVP4_peg.2046	Glycerol dehydrogenase (EC 1.1.1.6)	40.022	1448	30	38.3	11	3.14
DVP4_peg.2045	Phosphoenolpyruvate-dihydroxyacetone phosphotransferase (EC 2.7.1.121), dihydroxyacetone binding subunit DhaK	34.813	1433	39	41.3	16	9.1
DVP4_peg.303	NAD-dependent glyceraldehyde-3-phosphate dehydrogenase (EC 1.2.1.12)	36.309	879	19	32.1	8	2.24
DVP4_peg.2044	Phosphoenolpyruvate-dihydroxyacetone phosphotransferase (EC 2.7.1.121), ADP-binding subunit DhaL	21.022	815	23	44	9	13.81
DVP4_peg.1077	Chaperone protein DnaK	65.797	799	33	29.2	16	2.42
DVP4_peg.2050	Ornithine carbamoyltransferase (EC 2.1.3.3)	37.797	776	21	26.7	8	2.97
DVP4_peg.2302	Alkyl hydroperoxide reductase protein C (EC 1.6.4.-)	21.196	706	17	41.8	7	4.92
DVP4_peg.1919	Arginine deiminase (EC 3.5.3.6)	47.3	681	17	31.9	13	2.69
DVP4_peg.692	Translation elongation factor Ts	32.494	653	20	44.2	13	6.69
DVP4_peg.2471	Heat shock protein 60 family co-chaperone GroES	10.262	619	13	67	7	36.81
DVP4_peg.1995	Triacylglycerol lipase (EC 3.1.1.3)	80.118	589	23	21.9	15	1.75
DVP4_peg.279	putative extracellular amidase	29.409	583	19	38.2	7	2.62
DVP4_peg.248	Alcohol dehydrogenase (EC 1.1.1.1); Acetaldehyde dehydrogenase (EC 1.2.1.10)	95.971	557	18	18.3	14	1
DVP4_peg.32	Translation elongation factor Tu	43.203	528	14	22.8	7	1.16
DVP4_peg.1141	LSU ribosomal protein L21p	11.271	444	10	66.7	6	16.74
DVP4_peg.1779	Immunodominant staphylococcal antigen A precursor	24.054	392	11	7.8	2	0.8
DVP4_peg.1742	Threonine dehydrogenase and related Zn-dependent dehydrogenases	38.369	390	7	9.4	3	0.64
DVP4_peg.1389	LSU ribosomal protein L6p (L9e)	19.582	379	8	35.4	5	2.34
DVP4_peg.24	LSU ribosomal protein L7/L12 (P1/P2)	12.705	375	10	49.2	5	5.32
DVP4_peg.2076	Pyruvate formate-lyase (EC 2.3.1.54)	85.127	362	12	12.4	10	0.75
DVP4_peg.552	Dihydrolipoamide dehydrogenase of pyruvate dehydrogenase complex (EC 1.8.1.4)	49.704	331	12	16.5	7	0.95
DVP4_peg.1345	alkaline shock protein 23	18.866	279	6	19.6	3	1.11
DVP4_peg.1377	LSU ribosomal protein L17p	13.739	276	7	45.9	5	4.46
DVP4_peg.305	Triosephosphate isomerase (EC 5.3.1.1)	27.682	272	7	22.1	5	1.35
DVP4_peg.105	Alcohol dehydrogenase (EC 1.1.1.1)	36.435	267	5	10.1	3	0.48
DVP4_peg.2556	ATP synthase beta chain (EC 3.6.3.14)	51.539	263	9	15.7	6	0.91
DVP4_peg.597	Thioredoxin	11.566	257	8	53.8	5	6.51
DVP4_peg.1050	Manganese superoxide dismutase (EC 1.15.1.1)	22.769	256	6	31.2	4	1.29
DVP4_peg.418	Glucose-6-phosphate isomerase (EC 5.3.1.9)	49.503	236	10	13.5	6	0.96
DVP4_peg.1615	Phosphoglycerate mutase (EC 5.4.2.1)	26.727	234	8	30.3	6	1.89
DVP4_peg.694	Ribosome recycling factor	20.514	229	9	20.7	4	1.5
DVP4_peg.534	Phosphocarrier protein of PTS system	9.535	218	5	27.3	2	5.95
DVP4_peg.2244	Alanine dehydrogenase (EC 1.4.1.1)	39.74	216	7	20.8	6	1.05
DVP4_peg.1824	Fructose-bisphosphate aldolase class I (EC 4.1.2.13)	33.143	213	7	19.3	5	1.04
DVP4_peg.120	Staphylococcal accessory regulator A (SarA)	14.835	212	7	23.4	3	1.57
DVP4_peg.2043	Phosphoenolpyruvate-dihydroxyacetone phosphotransferase (EC 2.7.1.121), subunit DhaM; DHA-specific IIA component	13.244	207	4	24.2	2	1.03
DVP4_peg.1194	Universal stress protein family	18.488	203	6	24.1	4	1.76
DVP4_peg.1929	2,3-butanediol dehydrogenase, S-alcohol forming, (R)-acetoin-specific (EC 1.1.1.4) / Acetoin (diacetyl) reductase (EC 1.1.1.5)	27.83	202	4	14.2	3	0.66
DVP4_peg.2554	ATP synthase alpha chain (EC 3.6.3.14)	54.821	199	9	11.3	6	0.68
DVP4_peg.1925	immunodominant antigen B	17.648	173	5	27.5	4	1.9
DVP4_peg.1396	LSU ribosomal protein L29p (L35e)	8.099	168	5	50.7	4	8.69
DVP4_peg.2290	SSU ribosomal protein S6p	11.728	167	5	44.9	4	3.87
DVP4_peg.690	GTP-sensing transcriptional pleiotropic repressor codY	28.872	161	5	13.6	4	0.93
DVP4_peg.1918	Ornithine carbamoyltransferase (EC 2.1.3.3)	38.161	158	6	7.2	2	0.64
DVP4_peg.2218	LSU ribosomal protein L9p	16.353	157	5	31.8	5	3.21
DVP4_peg.85	Phosphate acetyltransferase (EC 2.3.1.8)	35.171	152	5	14.6	5	0.96
DVP4_peg.2418	Ferritin-like protein 2	19.685	149	4	13.9	2	0.61
DVP4_peg.2317	Inosine-5'-monophosphate dehydrogenase (EC 1.1.1.205) / CBS domain	52.732	146	9	11.9	6	0.72
DVP4_peg.1083	SSU ribosomal protein S20p	9.212	143	2	18.1	1	0.65
DVP4_peg.1404	LSU ribosomal protein L3p (L3e)	23.654	135	6	10.9	2	0.49
DVP4_peg.1371	SSU ribosomal protein S9p (S16e)	14.637	134	3	17.7	2	0.89
DVP4_peg.1076	Chaperone protein DnaJ	41.669	130	3	5.6	2	0.26
DVP4_peg.1078	Heat shock protein GrpE	24.159	128	5	14.8	4	1.18
DVP4_peg.22	LSU ribosomal protein L1p (L10Ae)	25.04	127	4	17.7	4	1.12
DVP4_peg.21	LSU ribosomal protein L11p (L12e)	14.949	125	6	21.4	3	1.55
DVP4_peg.1025	Translation elongation factor P	20.621	122	4	9.2	2	0.98
DVP4_peg.1400	SSU ribosomal protein S19p (S15e)	10.553	120	4	28.3	2	1.41
DVP4_peg.1378	DNA-directed RNA polymerase alpha subunit (EC 2.7.7.6)	35.005	119	5	13.4	4	0.72
DVP4_peg.23	LSU ribosomal protein L10p (P0)	17.797	119	5	17.5	3	1.21
DVP4_peg.1388	LSU ribosomal protein L18p (L5e)	13.261	114	3	17.5	2	1.03
DVP4_peg.1380	SSU ribosomal protein S13p (S18e)	13.71	112	2	9.9	1	0.4
DVP4_peg.620	Cell division protein FtsZ (EC 3.4.24.-)	41.436	108	2	6.6	2	0.26
DVP4_peg.1275	Transaldolase (EC 2.2.1.2)	26.002	106	4	18.1	4	1.07
DVP4_peg.2656	Cysteine synthase (EC 2.5.1.47)	33.106	106	5	13.2	4	1.05
DVP4_peg.1386	LSU ribosomal protein L30p (L7e)	6.578	105	1	23.7	1	1.01
DVP4_peg.1381	LSU ribosomal protein L36p	4.459	104	4	24.3	1	6.44
DVP4_peg.1372	LSU ribosomal protein L13p (L13Ae)	16.301	95	3	15.2	2	0.78
DVP4_peg.546	Protein of unknown function DUF1447	8.72	95	3	12.5	1	0.69
DVP4_peg.673	SSU ribosomal protein S16p	10.381	94	2	8.8	1	0.56
DVP4_peg.2255	Triacylglycerol lipase (EC 3.1.1.3)	74.2	93	5	5.5	3	0.29
DVP4_peg.1309	Hypothetical protein SAV1845	13.391	90	5	36	4	3.02
DVP4_peg.197	Transcriptional regulator MgrA (Regulator of autolytic activity)	17.184	88	2	6.1	1	0.31
DVP4_peg.785	FIG01108406: hypothetical protein	9.611	86	2	33.3	2	1.61
DVP4_peg.512	quinol oxidase polypeptide II QoxA (EC:1.9.3.-)	42.979	84	3	7.5	3	0.39
DVP4_peg.1048	LSU ribosomal protein L33p @ LSU ribosomal protein L33p, zinc-dependent	6.005	81	1	26.5	1	1.13
DVP4_peg.2641	Protein of unknown function identified by role in sporulation (SpoVG)	11.455	81	1	8.8	1	0.5
DVP4_peg.31	Translation elongation factor G	77.054	80	1	1.9	1	0.06
DVP4_peg.1399	LSU ribosomal protein L22p (L17e)	12.384	79	3	6.2	1	0.46
DVP4_peg.551	Dihydrolipoamide acetyltransferase component of pyruvate dehydrogenase complex (EC 2.3.1.12)	47.717	79	3	8.9	3	0.35
DVP4_peg.84	Hemoprotein HemQ, essential component of heme biosynthetic pathway in Gram-positive bacteria	29.768	74	5	15.3	4	0.89
DVP4_peg.1402	LSU ribosomal protein L23p (L23Ae)	10.634	71	1	11	1	0.55
DVP4_peg.1715	acetyltransferase (GNAT) family protein	10.395	70	2	20.4	2	1.43
DVP4_peg.1155	Porphobilinogen synthase (EC 4.2.1.24)	62.83	69	2	1.8	1	0.08
DVP4_peg.943	Cell division protein GpsB, coordinates the switch between cylindrical and septal cell wall synthesis by re-localization of PBP1	12.955	68	2	8.9	1	1.05
DVP4_peg.173	Flavohemoprotein (Hemoglobin-like protein) (Flavohemoglobin) (Nitric oxide dioxygenase) (EC 1.14.12.17)	43.052	66	1	3.1	1	0.12
DVP4_peg.1385	LSU ribosomal protein L15p (L27Ae)	15.567	65	2	9.6	1	0.35
DVP4_peg.435	3-oxoacyl-[acyl-carrier-protein] synthase, KASII (EC 2.3.1.179)	43.826	65	1	2.4	1	0.11
DVP4_peg.586	LSU ribosomal protein L32p	6.81	65	1	22.8	1	0.96
DVP4_peg.1003	6-phosphogluconate dehydrogenase, decarboxylating (EC 1.1.1.44)	52.177	62	3	6.8	3	0.31
DVP4_peg.432	ClpB protein	98.389	62	2	2.4	2	0.1
DVP4_peg.964	Nucleoside diphosphate kinase (EC 2.7.4.6)	16.595	62	2	15.4	2	0.76
DVP4_peg.971	SSU ribosomal protein S1p	43.22	61	2	6.6	2	0.25
DVP4_peg.343	Thioredoxin	12.48	60	1	12.3	1	0.46
DVP4_peg.1164	LSU ribosomal protein L20p	13.691	59	1	5.9	1	0.41
DVP4_peg.1182	Pyruvate kinase (EC 2.7.1.40)	63.224	59	1	2.2	1	0.08
DVP4_peg.1193	Alanine dehydrogenase (EC 1.4.1.1)	40.189	58	1	4	1	0.13
DVP4_peg.2644	LSU ribosomal protein L25p	23.831	57	2	8.7	2	0.49
DVP4_peg.710	Ribonuclease J2 (endoribonuclease in RNA processing)	62.748	57	1	2	1	0.08
DVP4_peg.1139	LSU ribosomal protein L27p	10.31	56	3	24.5	2	1.46
DVP4_peg.8	ATP-dependent Clp protease, ATP-binding subunit ClpC / Negative regulator of genetic competence clcC/mecB	91.095	56	1	1.3	1	0.05
DVP4_peg.2381	FIG000557: hypothetical protein co-occurring with RecR	11.619	55	1	7.6	1	0.49
DVP4_peg.2651	RNA binding protein, contains ribosomal protein S1 domain	14.801	54	1	8.3	1	0.37
DVP4_peg.1393	LSU ribosomal protein L24p (L26e)	11.481	48	1	9.5	1	0.5
DVP4_peg.2139	Hyaluronate lyase precursor (EC 4.2.2.1)	92.17	46	1	1.4	1	0.05

## Sheet: Table S5D
Table S5D: Secretome of S. saccharolyticus strain DVP4-17-2404 grown for 7 days in BHCY medium
Accession Nr	Annotation (RAST)	Mass kDa	Score	Significant Matches	Coverage %	Unique Peptides	emPAI
DVP4_peg.2470	Heat shock protein 60 family chaperone GroEL	57.57	3244	66	48.8	23	6.23
DVP4_peg.2046	Glycerol dehydrogenase (EC 1.1.1.6)	40.022	3050	61	51.4	14	6.46
DVP4_peg.307	Enolase (EC 4.2.1.11)	47.22	2114	45	49.1	18	6.46
DVP4_peg.2045	Phosphoenolpyruvate-dihydroxyacetone phosphotransferase (EC 2.7.1.121), dihydroxyacetone binding subunit DhaK	34.813	1863	50	51.9	18	12.18
DVP4_peg.968	DNA-binding protein HBsu	9.62	1622	35	63.3	7	27.49
DVP4_peg.1077	Chaperone protein DnaK	65.797	1521	50	40.6	23	4.65
DVP4_peg.303	NAD-dependent glyceraldehyde-3-phosphate dehydrogenase (EC 1.2.1.12)	36.309	1515	36	55.1	16	8.17
DVP4_peg.1995	Triacylglycerol lipase (EC 3.1.1.3)	80.118	1360	50	25.9	20	2.69
DVP4_peg.2050	Ornithine carbamoyltransferase (EC 2.1.3.3)	37.797	1130	31	32.7	11	4.08
DVP4_peg.2044	Phosphoenolpyruvate-dihydroxyacetone phosphotransferase (EC 2.7.1.121), ADP-binding subunit DhaL	21.022	1076	32	60.2	12	22.05
DVP4_peg.2076	Pyruvate formate-lyase (EC 2.3.1.54)	85.127	1002	41	31.1	22	2.82
DVP4_peg.1919	Arginine deiminase (EC 3.5.3.6)	47.3	997	32	33.8	14	3.07
DVP4_peg.279	putative extracellular amidase	29.409	854	23	28.2	6	2.61
DVP4_peg.692	Translation elongation factor Ts	32.494	852	26	50.7	14	7.85
DVP4_peg.248	Alcohol dehydrogenase (EC 1.1.1.1); Acetaldehyde dehydrogenase (EC 1.2.1.10)	95.971	847	32	20.3	18	1.56
DVP4_peg.1050	Manganese superoxide dismutase (EC 1.15.1.1)	22.769	764	16	38.7	5	1.81
DVP4_peg.32	Translation elongation factor Tu	43.203	697	20	33	9	1.68
DVP4_peg.2302	Alkyl hydroperoxide reductase protein C (EC 1.6.4.-)	21.196	639	18	41.8	7	4.9
DVP4_peg.1742	Threonine dehydrogenase and related Zn-dependent dehydrogenases	38.369	623	15	26.6	8	2.03
DVP4_peg.2471	Heat shock protein 60 family co-chaperone GroES	10.262	496	11	60.6	5	8.65
DVP4_peg.694	Ribosome recycling factor	20.514	484	13	39.1	7	3.96
DVP4_peg.597	Thioredoxin	11.566	460	12	53.8	5	6.48
DVP4_peg.552	Dihydrolipoamide dehydrogenase of pyruvate dehydrogenase complex (EC 1.8.1.4)	49.704	445	14	21.8	9	1.36
DVP4_peg.305	Triosephosphate isomerase (EC 5.3.1.1)	27.682	440	13	39.9	8	2.92
DVP4_peg.1345	alkaline shock protein 23	18.866	431	10	20.8	4	1.7
DVP4_peg.105	Alcohol dehydrogenase (EC 1.1.1.1)	36.435	408	10	20.1	6	1.18
DVP4_peg.1779	Immunodominant staphylococcal antigen A precursor	24.054	382	12	8.7	3	1.66
DVP4_peg.2554	ATP synthase alpha chain (EC 3.6.3.14)	54.821	365	12	16.1	7	0.83
DVP4_peg.1615	Phosphoglycerate mutase (EC 5.4.2.1)	26.727	354	14	43.4	9	3.89
DVP4_peg.1194	Universal stress protein family	18.488	342	12	45.8	7	4.88
DVP4_peg.1389	LSU ribosomal protein L6p (L9e)	19.582	341	11	39.3	6	3.23
DVP4_peg.1404	LSU ribosomal protein L3p (L3e)	23.654	318	6	10.9	2	0.82
DVP4_peg.24	LSU ribosomal protein L7/L12 (P1/P2)	12.705	306	11	25.4	3	2.02
DVP4_peg.2255	Triacylglycerol lipase (EC 3.1.1.3)	74.2	291	10	7.6	4	0.38
DVP4_peg.2244	Alanine dehydrogenase (EC 1.4.1.1)	39.74	280	10	26.4	8	1.59
DVP4_peg.620	Cell division protein FtsZ (EC 3.4.24.-)	41.436	271	6	14	5	0.77
DVP4_peg.1824	Fructose-bisphosphate aldolase class I (EC 4.1.2.13)	33.143	270	7	19.3	5	1.04
DVP4_peg.2218	LSU ribosomal protein L9p	16.353	267	8	35.1	5	3.2
DVP4_peg.418	Glucose-6-phosphate isomerase (EC 5.3.1.9)	49.503	266	9	13.5	6	0.78
DVP4_peg.534	Phosphocarrier protein of PTS system	9.535	260	8	58	4	10.24
DVP4_peg.1929	2,3-butanediol dehydrogenase, S-alcohol forming, (R)-acetoin-specific (EC 1.1.1.4) / Acetoin (diacetyl) reductase (EC 1.1.1.5)	27.83	259	7	36.5	7	2.27
DVP4_peg.2556	ATP synthase beta chain (EC 3.6.3.14)	51.539	254	9	12.3	5	0.58
DVP4_peg.1078	Heat shock protein GrpE	24.159	252	8	22.9	5	1.65
DVP4_peg.1377	LSU ribosomal protein L17p	13.739	236	9	32	4	2.88
DVP4_peg.1378	DNA-directed RNA polymerase alpha subunit (EC 2.7.7.6)	35.005	234	5	13.7	4	0.72
DVP4_peg.1141	LSU ribosomal protein L21p	11.271	233	6	37.3	3	4.16
DVP4_peg.85	Phosphate acetyltransferase (EC 2.3.1.8)	35.171	226	9	17.6	6	1.56
DVP4_peg.120	Staphylococcal accessory regulator A (SarA)	14.835	221	7	23.4	3	1.57
DVP4_peg.2644	LSU ribosomal protein L25p	23.831	217	5	16.4	3	0.81
DVP4_peg.2641	Protein of unknown function identified by role in sporulation (SpoVG)	11.455	211	6	42.2	4	6.62
DVP4_peg.1402	LSU ribosomal protein L23p (L23Ae)	10.634	204	6	27.5	4	4.7
DVP4_peg.2043	Phosphoenolpyruvate-dihydroxyacetone phosphotransferase (EC 2.7.1.121), subunit DhaM; DHA-specific IIA component	13.244	204	6	24.2	2	1.88
DVP4_peg.512	quinol oxidase polypeptide II QoxA (EC:1.9.3.-)	42.979	204	7	11.5	5	0.74
DVP4_peg.1309	Hypothetical protein SAV1845	13.391	201	6	46.5	4	3.01
DVP4_peg.1388	LSU ribosomal protein L18p (L5e)	13.261	197	4	25	3	1.88
DVP4_peg.1076	Chaperone protein DnaJ	41.669	194	5	12.3	4	0.58
DVP4_peg.1139	LSU ribosomal protein L27p	10.31	180	6	29.8	4	5.02
DVP4_peg.304	Phosphoglycerate kinase (EC 2.7.2.3)	42.848	179	6	9.1	4	0.56
DVP4_peg.1025	Translation elongation factor P	20.621	177	6	9.2	2	0.98
DVP4_peg.1387	SSU ribosomal protein S5p (S2e)	17.716	175	6	20.5	3	1.21
DVP4_peg.2317	Inosine-5'-monophosphate dehydrogenase (EC 1.1.1.205) / CBS domain	52.732	174	7	9.8	5	0.72
DVP4_peg.1003	6-phosphogluconate dehydrogenase, decarboxylating (EC 1.1.1.44)	52.177	173	6	12	6	0.73
DVP4_peg.1918	Ornithine carbamoyltransferase (EC 2.1.3.3)	38.161	173	7	7.2	3	0.64
DVP4_peg.2656	Cysteine synthase (EC 2.5.1.47)	33.106	170	6	17.1	5	1.04
DVP4_peg.1400	SSU ribosomal protein S19p (S15e)	10.553	169	6	43.5	3	2.74
DVP4_peg.690	GTP-sensing transcriptional pleiotropic repressor codY	28.872	168	6	12.1	3	0.63
DVP4_peg.22	LSU ribosomal protein L1p (L10Ae)	25.04	167	6	16	4	1.12
DVP4_peg.8	ATP-dependent Clp protease, ATP-binding subunit ClpC / Negative regulator of genetic competence clcC/mecB	91.095	163	9	10.5	7	0.52
DVP4_peg.1275	Transaldolase (EC 2.2.1.2)	26.002	162	8	28.3	7	2.56
DVP4_peg.2291	Single-stranded DNA-binding protein	18.804	162	4	27.2	4	1.72
DVP4_peg.2539	LSU ribosomal protein L31p @ LSU ribosomal protein L31p, zinc-independent	9.773	159	3	29.4	2	1.58
DVP4_peg.1396	LSU ribosomal protein L29p (L35e)	8.099	151	4	50.7	4	8.65
DVP4_peg.354	FIG01108089: hypothetical protein	6.793	148	4	50.8	3	6.54
DVP4_peg.1715	acetyltransferase (GNAT) family protein	10.395	139	3	20.4	2	1.43
DVP4_peg.1925	immunodominant antigen B	17.648	139	4	15.6	2	0.7
DVP4_peg.2290	SSU ribosomal protein S6p	11.728	139	5	15.3	2	1.2
DVP4_peg.1371	SSU ribosomal protein S9p (S16e)	14.637	136	3	17.7	2	0.89
DVP4_peg.983	Staphylococcal respiratory response protein SrrA	28.073	136	3	10.8	2	0.4
DVP4_peg.84	Hemoprotein HemQ, essential component of heme biosynthetic pathway in Gram-positive bacteria	29.768	126	5	12.9	3	0.61
DVP4_peg.1372	LSU ribosomal protein L13p (L13Ae)	16.301	123	3	15.9	2	0.78
DVP4_peg.296	ATP-dependent Clp protease proteolytic subunit (EC 3.4.21.92)	21.5	121	5	10.3	2	0.55
DVP4_peg.551	Dihydrolipoamide acetyltransferase component of pyruvate dehydrogenase complex (EC 2.3.1.12)	47.717	120	6	12.3	5	0.64
DVP4_peg.971	SSU ribosomal protein S1p	43.22	118	4	9.4	3	0.39
DVP4_peg.21	LSU ribosomal protein L11p (L12e)	14.949	117	5	25.7	3	1.55
DVP4_peg.1383	Adenylate kinase (EC 2.7.4.3)	24.151	114	3	10.2	3	0.79
DVP4_peg.2381	FIG000557: hypothetical protein co-occurring with RecR	11.619	114	5	17.1	2	1.22
DVP4_peg.343	Thioredoxin	12.48	112	3	21.7	2	1.11
DVP4_peg.673	SSU ribosomal protein S16p	10.381	108	2	8.8	1	0.56
DVP4_peg.2651	RNA binding protein, contains ribosomal protein S1 domain	14.801	106	3	15	2	0.88
DVP4_peg.943	Cell division protein GpsB, coordinates the switch between cylindrical and septal cell wall synthesis by re-localization of PBP1	12.955	106	4	17	2	1.93
DVP4_peg.501	Bifunctional autolysin Atl / N-acetylmuramoyl-L-alanine amidase (EC 3.5.1.28)/ endo-beta-N-acetylglucosaminidase (EC 3.2.1.96)	141.705	105	3	2.2	3	0.11
DVP4_peg.833	Oligoendopeptidase F (EC 3.4.24.-)	69.641	105	3	3	2	0.15
DVP4_peg.1155	Porphobilinogen synthase (EC 4.2.1.24)	62.83	102	3	4	2	0.16
DVP4_peg.964	Nucleoside diphosphate kinase (EC 2.7.4.6)	16.595	101	4	23.5	3	1.33
DVP4_peg.1386	LSU ribosomal protein L30p (L7e)	6.578	98	4	42.4	3	7.05
DVP4_peg.1166	Translation initiation factor 3	20.332	97	3	16.6	3	1
DVP4_peg.1241	Hypothetical protein SAV1752	15.83	97	3	11.4	2	0.8
DVP4_peg.432	ClpB protein	98.389	97	6	6.4	4	0.27
DVP4_peg.226	6-carboxytetrahydropterin synthase (EC 4.1.2.50) @ Queuosine biosynthesis QueD, PTPS-I	16.318	96	3	38.8	3	1.37
DVP4_peg.78	Uracil-DNA glycosylase, family 1	25.308	96	2	13.9	2	0.45
DVP4_peg.1182	Pyruvate kinase (EC 2.7.1.40)	63.224	94	3	6.5	3	0.25
DVP4_peg.1405	SSU ribosomal protein S10p (S20e)	11.569	93	5	22.5	3	2.34
DVP4_peg.1161	Cell division trigger factor (EC 5.2.1.8)	48.351	91	3	7.2	3	0.34
DVP4_peg.549	Pyruvate dehydrogenase E1 component alpha subunit (EC 1.2.4.1)	41.247	90	4	13.8	4	0.58
DVP4_peg.1083	SSU ribosomal protein S20p	9.212	88	2	18.1	1	0.65
DVP4_peg.1939	Predicted cell-wall-anchored protein SasF (LPXAG motif)	74.485	88	3	3.2	2	0.14
DVP4_peg.691	SSU ribosomal protein S2p (SAe)	29.832	85	4	7.3	2	0.37
DVP4_peg.496	Naphthoate synthase (EC 4.1.3.36)	30.577	84	5	10.3	3	0.59
DVP4_peg.667	Acyl carrier protein / HmrB protein involved in methicillin resistance	8.559	82	3	9.1	1	0.71
DVP4_peg.1305	Foldase protein PrsA precursor (EC 5.2.1.8) @ Foldase clustered with pyrimidine conversion	36.181	81	3	9	3	0.48
DVP4_peg.899	PTS system, glucose-specific IIA component	18.158	81	3	16.3	3	1.17
DVP4_peg.1723	L-serine dehydratase, alpha subunit (EC 4.3.1.17)	31.468	80	3	10.4	3	0.57
DVP4_peg.2051	Carbamate kinase (EC 2.7.2.2)	33.659	80	4	12.3	4	0.75
DVP4_peg.2120	2,3-butanediol dehydrogenase, S-alcohol forming, (S)-acetoin-specific (EC 1.1.1.76)	28.016	79	2	8.2	2	0.4
DVP4_peg.1026	Aminopeptidase YpdF (MP-, MA-, MS-, AP-, NP- specific)	39.151	75	3	6	2	0.27
DVP4_peg.1193	Alanine dehydrogenase (EC 1.4.1.1)	40.189	75	4	16.1	4	0.6
DVP4_peg.2553	ATP synthase delta chain (EC 3.6.3.14)	20.359	75	2	11.7	2	0.59
DVP4_peg.710	Ribonuclease J2 (endoribonuclease in RNA processing)	62.748	73	2	3.6	2	0.16
DVP4_peg.746	Glutamine synthetase type I (EC 6.3.1.2)	51.02	73	5	8.3	4	0.45
DVP4_peg.1225	Chorismate mutase I (EC 5.4.99.5) / 2-keto-3-deoxy-D-arabino-heptulosonate-7-phosphate synthase I beta (EC 2.5.1.54)	40.809	72	2	7.4	2	0.26
DVP4_peg.1381	LSU ribosomal protein L36p	4.459	72	2	24.3	1	6.44
DVP4_peg.1575	General stress protein 26	16.124	72	2	6.4	1	0.34
DVP4_peg.2415	Immunodominant antigen B	20.673	72	2	9.3	2	0.58
DVP4_peg.449	Oligoendopeptidase F (EC 3.4.24.-)	70.084	70	2	3.2	2	0.15
DVP4_peg.23	LSU ribosomal protein L10p (P0)	17.797	69	3	10.8	2	0.7
DVP4_peg.535	Phosphoenolpyruvate-protein phosphotransferase of PTS system (EC 2.7.3.9)	63.308	69	2	3.7	2	0.16
DVP4_peg.1576	FIG01108504: hypothetical protein	13.027	68	1	8.6	1	0.43
DVP4_peg.2	Pyridoxine biosynthesis glutamine amidotransferase, synthase subunit (EC 2.4.2.-)	32.076	67	2	3.4	1	0.16
DVP4_peg.27	DNA-directed RNA polymerase beta' subunit (EC 2.7.7.6)	135.501	67	1	1	1	0.04
DVP4_peg.1264	6,7-dimethyl-8-ribityllumazine synthase (EC 2.5.1.78)	16.401	65	2	5.3	1	0.33
DVP4_peg.851	Cold shock protein CspA	7.333	65	1	39.4	1	0.87
DVP4_peg.2398	ThiJ/PfpI family protein	18.73	64	2	5.2	1	0.28
DVP4_peg.2560	3-hydroxyacyl-[acyl-carrier-protein] dehydratase, FabZ form (EC 4.2.1.59)	16.232	61	2	13.8	2	0.78
DVP4_peg.1125	Histidyl-tRNA synthetase (EC 6.1.1.21)	48.502	60	2	2.9	1	0.1
DVP4_peg.2234	DNA polymerase III beta subunit (EC 2.7.7.7)	42.164	60	3	7.4	3	0.4
DVP4_peg.1699	FIG01108052: hypothetical protein	11.256	58	1	12.5	1	0.51
DVP4_peg.2048	Acid phosphatase (EC 3.1.3.2)	33.991	58	3	6.1	2	0.32
DVP4_peg.165	Secretory antigen precursor SsaA	28.187	55	2	3.4	1	0.18
DVP4_peg.2139	Hyaluronate lyase precursor (EC 4.2.2.1)	92.17	55	3	3.1	3	0.17
DVP4_peg.2226	Seryl-tRNA synthetase (EC 6.1.1.11)	49.161	55	2	3.5	2	0.21
DVP4_peg.435	3-oxoacyl-[acyl-carrier-protein] synthase, KASII (EC 2.3.1.179)	43.826	55	2	4.6	2	0.24
DVP4_peg.513	Putative peptidoglycan bound protein (LPXTG motif) Lmo1799 homolog	39.547	55	1	3	1	0.13
DVP4_peg.1724	L-serine dehydratase, beta subunit (EC 4.3.1.17)	24.451	53	1	4	1	0.21
DVP4_peg.997	Glucose-6-phosphate 1-dehydrogenase (EC 1.1.1.49)	56.9	52	3	4	2	0.18
DVP4_peg.31	Translation elongation factor G	77.054	51	1	1.3	1	0.06
DVP4_peg.515	Chitinase B	11.372	51	1	8.6	1	0.51
DVP4_peg.1044	FIG01108604: hypothetical protein	12.366	50	1	7.4	1	0.46
DVP4_peg.1621	FIG01107902: hypothetical protein	27.784	50	1	3	1	0.19
DVP4_peg.197	Transcriptional regulator MgrA (Regulator of autolytic activity)	17.184	49	1	6.1	1	0.31
DVP4_peg.1938	N-acetylmuramoyl-L-alanine amidase, family 4	74.044	48	1	1.7	1	0.07
DVP4_peg.29	SSU ribosomal protein S12p (S23e)	15.308	46	1	8	1	0.36
